# Supplementary material for: Defining an EPOR- Regulated Transcriptome for Primary Progenitors, including Tnfr-sf13c as a Novel Mediator of EPO- Dependent Erythroblast Formation
Source: PubMed Central journal article supplement (PMC3396641; doi:10.1371/journal.pone.0038530), 2012-07-13
Supplement: pone.0038530.s012.pdf [file pone.0038530.s012.pdf]

## SUPPLEMENTAL TABLE S8: EPO/EPOR MODULATED OTHER

| gene symbol, gene name [Entrez gene ID]                                                                                                                         | EPO modulation, fold change | known / novel | description                                                                                                                                                                  | reference (PMID or MGI) |
|-----------------------------------------------------------------------------------------------------------------------------------------------------------------|-----------------------------|---------------|------------------------------------------------------------------------------------------------------------------------------------------------------------------------------|-------------------------|
| <i>Rnf141</i> , ring finger protein 141 [67150]                                                                                                                 | 2.2x down                   | N             | plays an important role in mouse spermatogenesis, including spermatogenic cell proliferation and sperm mutation, as well as motility and fertilization                       | 18823591                |
| <i>493042210Rik</i> , RIKEN cDNA 4930422107 gene [71640]                                                                                                        | 2.4x down                   | N             | zinc finger protein 949                                                                                                                                                      | MGI:1918890             |
| <i>1190002F15Rik</i> , RIKEN cDNA 1190002F15 gene [381822]                                                                                                      | 2.1x down                   | N             | unknown                                                                                                                                                                      | MGI:1915081             |
| <i>545228</i> , Gm5817 predicted gene 5817 [545228]                                                                                                             | 2.2x down                   | N             | unknown                                                                                                                                                                      | MGI:3779527             |
| <i>AA408296</i> , expressed sequence AA408296 [215193]                                                                                                          | 2.0x up                     | N             | digestive organ expansion factor homolog (zebrafish)                                                                                                                         | MGI:2138080             |
| <i>Pcgf3</i> , polycomb group ring finger 3 [69587]                                                                                                             | 2.1x up                     | N             | unknown                                                                                                                                                                      | MGI:1916837             |
| <i>LOC636713</i> or <i>Srfbp1</i> , similar to SRF-dependent transcription regulation associated protein serum response factor binding protein 1 [636713/67222] | 2.1x up                     | N             | May be involved in regulating transcriptional activation of cardiac genes during aging process; may play a role in biosynthesis and/or processing of SLC2A4 in adipose cells | MGI:1914472             |
| <i>1700097N02Rik</i> , RIKEN cDNA 1700097N02 gene [67522]                                                                                                       | 2.1x up                     | N             | unknown                                                                                                                                                                      | MGI:1914772             |
| <i>2310043N10Rik</i> or <i>Neat1</i> , nuclear paraspeckle assembly transcript 1 [66961]                                                                        | 2.1x down                   | N             | Plays a role in paraspeckle formation                                                                                                                                        | 20211624; 19217333      |
| <i>6230427J02Rik</i> or <i>Inka1</i> , RIKEN cDNA 6230427J02 gene [68176]                                                                                       | 2.1x up                     | N             | Known as Inka1; gene regulated in the neural crest required for craniofacial morphogenesis in fish and frog                                                                  | 20175189                |
| <i>D16Erd472e</i> , DNA segment, Chr 16, ERATO Doi 472 [67102]                                                                                                  | 2.6x up                     | N             | unknown                                                                                                                                                                      | MGI:1196400             |
| <i>Snhg7</i> , small nucleolar RNA host gene (non-protein coding) 7 [72091]                                                                                     | 2.6x up                     | N             | unknown                                                                                                                                                                      | MGI:1919341             |
| <i>2810474O19Rik</i> , RIKEN cDNA 2810474O19 gene [67246]                                                                                                       | 2.6x up                     | N             | unknown                                                                                                                                                                      | MGI:1914496             |
| <i>Tmem185b</i> , transmembrane protein 185B [226351]                                                                                                           | 2.6x up                     | N             | Transmembrane protein involved with G-protein-coupled receptors                                                                                                              | 15525354                |
| <i>Bend3</i> , BEN domain containing 3 [331623]                                                                                                                 | 2.5x up                     | N             | unknown                                                                                                                                                                      | MGI:2677212             |
| <i>Kbtbd8</i> , kelch repeat and BTB (POZ) domain containing 3 [243574]                                                                                         | 2.5x up                     | N             | unknown                                                                                                                                                                      | MGI:2661430             |
| <i>Gtlf3a</i> , Gm16516 predicted gene, Gm16516 [24082]                                                                                                         | 3.9x up                     | K             | Expressed during formation of early hematopoietic cells                                                                                                                      | 10402672                |
| <i>Irf35</i> , interferon-induced protein 35 [70110]                                                                                                            | 2.3x up                     | N             | interferon-induced leucine zipper protein that undergoes interferon-regulated cellular redistribution                                                                        | 8288566                 |
| <i>2410016O06Rik</i> , RIKEN cDNA 2410016O06 gene [71952]                                                                                                       | 3.2x up                     | N             | Histone demethylase involved in chromatin remodeling                                                                                                                         | 14742713                |
| <i>2700023E23Rik</i> , RIKEN cDNA 2700023E23 gene [70036]                                                                                                       | 2.9x up                     | N             | unknown                                                                                                                                                                      | MGI:1917286             |
| <i>Fhl1</i> , four and a half LIM domains 1 [14199]                                                                                                             | 2.2x up                     | N             | May have an involvement in muscle development or hypertrophy                                                                                                                 | 21310615                |
| <i>Gdap10</i> , Gdap10 ganglioside-induced differentiation-associated-protein 10 [14546]                                                                        | 2.2x up                     | N             | May be involved in the signal transduction pathway that is triggered through the expression of a single sialyltransferase gene                                               | 10217254                |
| <i>Ccdc137</i> , coiled-coil domain containing 137 [Ccdc137]                                                                                                    | 2.2x up                     | N             | unknown                                                                                                                                                                      | MGI:1914541             |
| <i>2810474O19Rik</i> , RIKEN cDNA 2810474O19 gene [67246]                                                                                                       | 3.1x up                     | N             | unknown                                                                                                                                                                      | MGI:1914496             |
| <i>Wdr43</i> , WD repeat domain 43 [72515]                                                                                                                      | 2.4x up                     | N             | unknown                                                                                                                                                                      | MGI:1919765             |
| <i>No19</i> , nucleolar protein 9 [74035]                                                                                                                       | 2.4x up                     | N             | unknown                                                                                                                                                                      | MGI:1921285             |
| <i>Ssca1</i> , Sjogren's syndrome/scleroderma autoantigen 1 homolog [56390]                                                                                     | 2.5x up                     | N             | Might play a role in mitosis. Antigenic molecule. Could be a centromere-associated protein. May induce anti-centromere antibodies.                                           | 9486406                 |
| <i>Fam46c</i> , family with sequence similarity 46, member C [74645]                                                                                            | 2.5x up                     | N             | unknown                                                                                                                                                                      | MGI:1921895             |
| <i>Cnbp</i> , cellular nucleic acid binding protein [7555]                                                                                                      | 2.8x up                     | N             | May be involved in controlling cell death and proliferation rates                                                                                                            | 20960530                |
| <i>YdjC</i> , YdjC homolog [69101]                                                                                                                              | 3.5x up                     | N             | Contains a structural relationship with peptidoglycan N-acetylglucosamine deacetylase                                                                                        | 18177738                |
| <i>Sri</i> , sorcin [109552]                                                                                                                                    | 2.9x down                   | N             | Calcium-binding protein that modulates excitation-contraction coupling in the heart.                                                                                         | 17699613                |
| <i>9530029O12Rik</i> , RIKEN cDNA 9530029O12 gene [399629]                                                                                                      | 2.3x up                     | N             | unknown                                                                                                                                                                      | MGI:3026981             |
| <i>Cdv3</i> , carnitine deficiency-associated gene expressed in ventricle 3 [321022]                                                                            | 2.3x up                     | N             | May be involved in the development of cardiac hypertrophy caused by carnitine deficiency                                                                                     | 12359334                |
| <i>Nrp</i> , neuropilin 1 [654309]                                                                                                                              | 2.2x up                     | K             | May negatively regulates erythroid stem cell proliferation; an antagonist to IL-3 stimulation                                                                                | 2205877                 |
| <i>Ssbp3</i> , single-stranded DNA binding protein 3 [23648]                                                                                                    | 2.1x down                   | N             | unknown                                                                                                                                                                      | MGI:1919725             |
